# Supplementary material for: A distance-based paper sensor for the determination of chloride ions using silver nanoparticles
Source: Royal Society of Chemistry journal article supplement (doi:10.1039/c8an00670a), 2018-01-01
Supplement: c8an00670a1.pdf [file c8an00670a1.pdf]

**Supplemental Information**  
**Distance -based Paper Sensor for Determination of Chloride ion Using**  
**Silver Nanoparticles**

**Kamonchanok Phoonsawat<sup>1</sup> • Nalin Ratnarathorn<sup>1</sup>• Charles S. Henry<sup>2</sup> •**

**Wijitar Dungchai<sup>1\*</sup>**

*1) Organic Synthesis, Electrochemistry & Natural Product Research Unit, Department  
of Chemistry, Faculty of Science, King Mongkut's University of Technology*

*Thonburi, Prachautid Road, Thungkru, Bangkok, 10140, Thailand*

*2) Departments of Chemistry and Chemical & Biological Engineering and School of  
Biomedical Engineering, Colorado State University, Fort Collins, CO 80523.*

*Corresponding author: Asst. Prof. Dr. Wijitar Dungchai*

*E-mail: wijitar.dun@kmutt.ac.th*

*Fax: +66-02-470-8840*

*Tel: +66-02-470-9553*

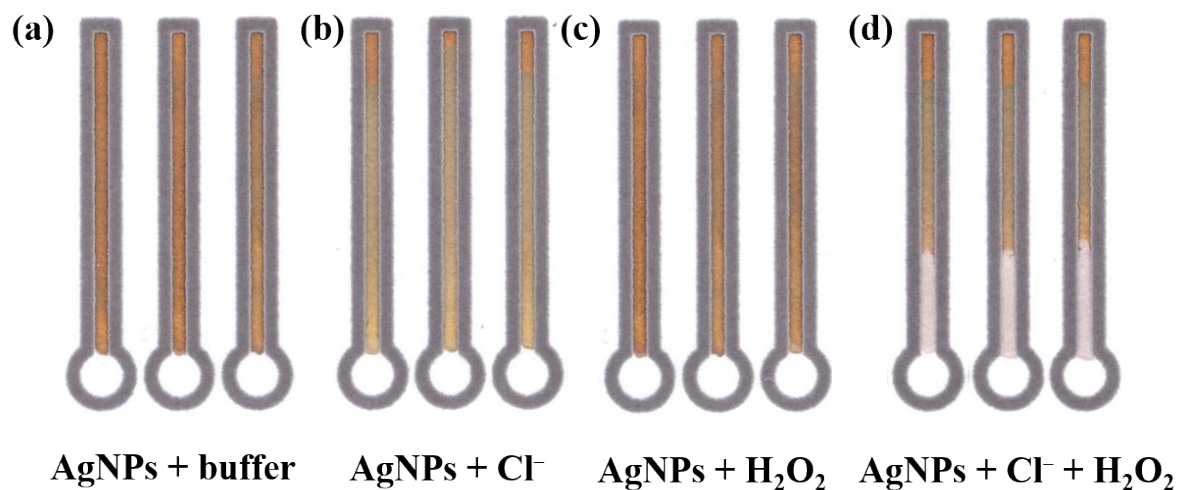

**Fig. S1** Paper-based device modified with AgNPs the addition of (a) buffer, (b) Cl<sup>-</sup> solution, (c) H<sub>2</sub>O<sub>2</sub> solution, and (d) mixture solution of Cl<sup>-</sup> and H<sub>2</sub>O<sub>2</sub>.

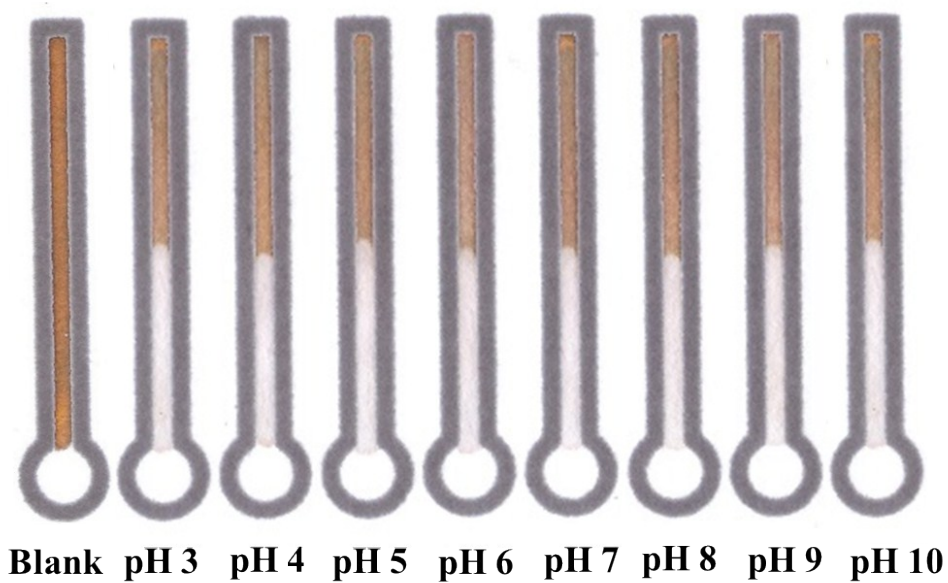

**Fig. S2** The effect of pH on the Cl<sup>-</sup> determination was determined using a buffer solution in pH range of 3–10.

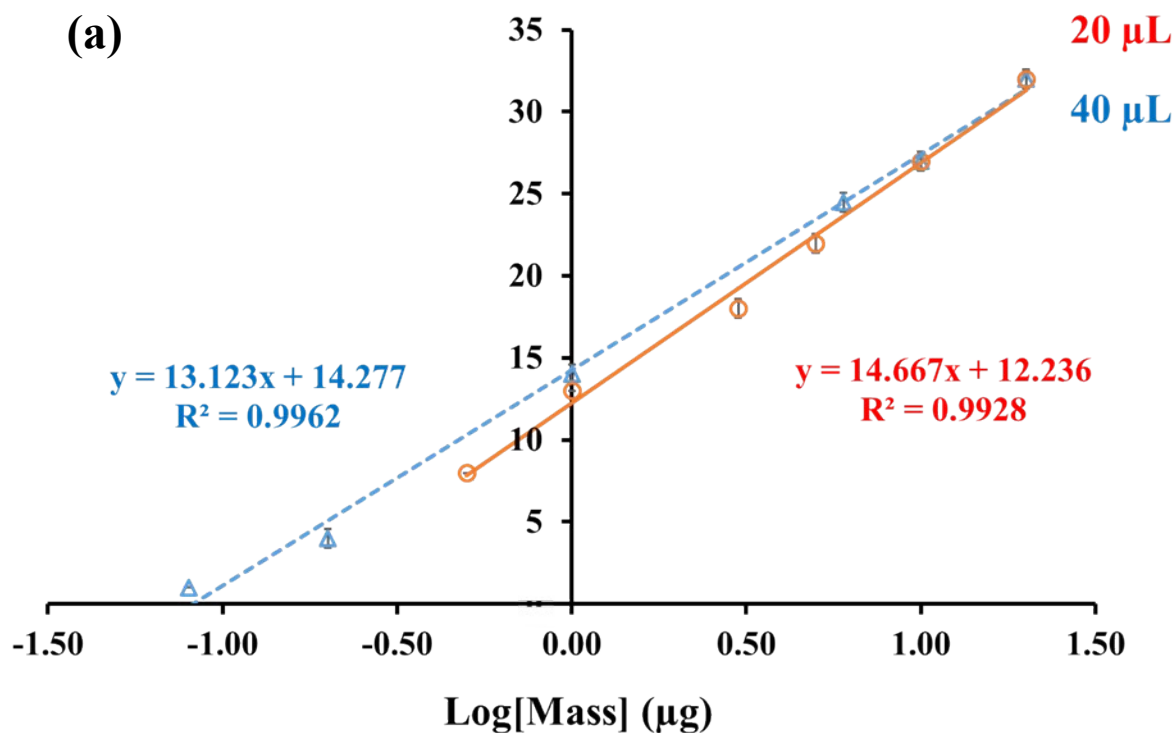

(b)

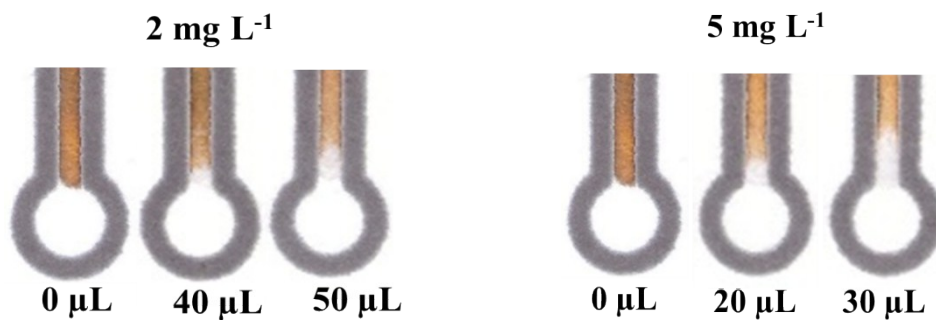

| Concentration (2 $\text{mg L}^{-1}$ ) |   |      |      | Concentration (5 $\text{mg L}^{-1}$ ) |   |      |      |
|---------------------------------------|---|------|------|---------------------------------------|---|------|------|
| Volume ( $\mu\text{L}$ )              | 0 | 40   | 50   | Volume ( $\mu\text{L}$ )              | 0 | 20   | 30   |
| Mass ( $\mu\text{g}$ )                | 0 | 0.08 | 0.10 | Mass ( $\mu\text{g}$ )                | 0 | 0.10 | 0.15 |

**Fig. S3** (a) The calibration plot showing the color band distance (Y-axis) with the logarithmic mass of  $\text{Cl}^-$  (X-axis) at a volume of sample/standard 20  $\mu\text{L}$  and 40  $\mu\text{L}$ . (b) The mass of 2  $\text{mg L}^{-1}$  (volume: 40  $\mu\text{L}$  and 50  $\mu\text{L}$ ) and 5  $\text{mg L}^{-1}$  of  $\text{Cl}^-$  (volume: 20  $\mu\text{L}$  and 30  $\mu\text{L}$ )

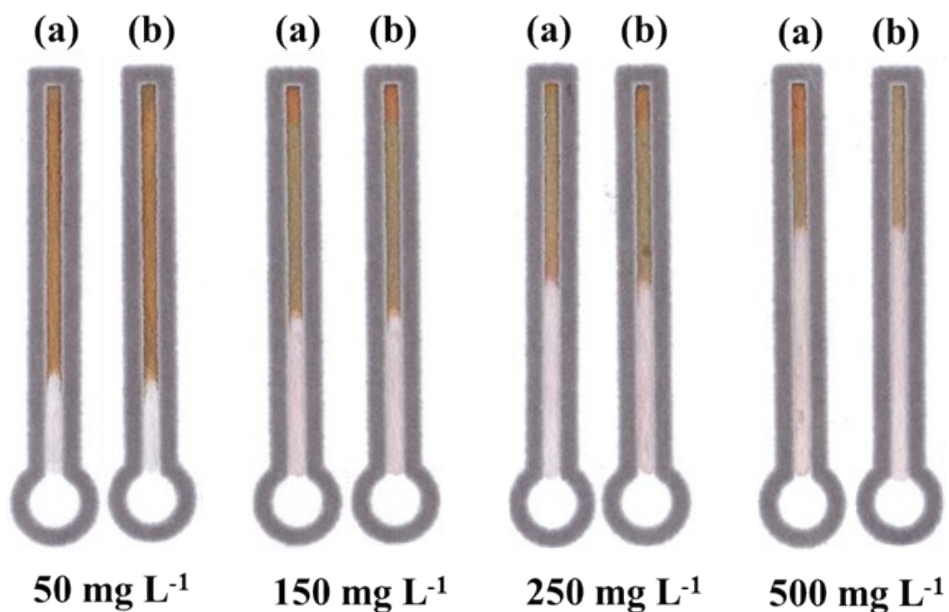

**Fig. S4** The color band distance of  $\text{Cl}^-$  at the sample/standard concentration of 50, 150, 250 and 500  $\text{mg L}^{-1}$  is in (a) the ratio of  $\text{Cl}^- : \text{H}_2\text{O}_2$  (1:1) and (b)  $\text{Cl}^- : \text{H}_2\text{O}_2$  (3-4 drops of 0.2%).

**Table. S1** Comparison of the percentage of accuracy obtained from our device and test-kit (n = 30).

| Sample                            | %Relative accuracy (n = 30) |          |
|-----------------------------------|-----------------------------|----------|
|                                   | Our device                  | Test-kit |
| Standard 500 $\text{mg L}^{-1}$   | 91-104%                     | 66-200%  |
| Standard 750 $\text{mg L}^{-1}$   | 98-105%                     | 100-200% |
| Standard 1,000 $\text{mg L}^{-1}$ | 95-102%                     | 50-150%  |
| Standard 1,250 $\text{mg L}^{-1}$ | 99-106%                     | 40-160%  |
